# Supplementary material for: Pseudomonas aeruginosa Isolates from Spanish Children: Occurrence in Faecal Samples, Antimicrobial Resistance, Virulence, and Molecular Typing
Source: Hindawi journal article supplement (doi:10.1155/2018/8060178), 2018-06-11
Supplement: f1 [file 8060178.f1.pdf]

## Supplementary Material.

**Table S1:** Primers and annealing temperatures used in the PCR reactions of this study.

| Primer name | Sequence (5' → 3')       | Target gene | PCR product size (bp) | Annealing temperature (°C) | Reference |
|-------------|--------------------------|-------------|-----------------------|----------------------------|-----------|
| acsA-F      | ACCTGGTGTACGCCTCGCTGAC   | <i>acsA</i> | 842                   | 54                         | 1         |
| acsA-R      | GACATAGATGCCCTGCCCCTTGAT |             |                       |                            |           |
| aroE-F      | TGGGGCTATGACTGGAAACC     | <i>aroE</i> | 1053                  | 55                         | 1         |
| aroE-R      | TAACCCGGTTTTGTGATTCCTACA |             |                       |                            |           |
| guaA-F      | CGGCCTCGACGTGTGGATGA     | <i>guaA</i> | 940                   | 56                         | 1         |
| guaA-R      | GAACGCCTGGCTGGTCTTGTGGTA |             |                       |                            |           |
| mutL-F      | CCAGATCGCCGCCGGTGAGGTG   | <i>mutL</i> | 940                   | 58                         | 1         |
| mutL-R      | CAGGGTGCCATAGAGGAAGTC    |             |                       |                            |           |
| nuoD-F      | ACCGCCACCCGTA CTG        | <i>nuoD</i> | 1042                  | 55                         | 1         |
| nuoD-R      | TCTCGCCCATCTTGACCA       |             |                       |                            |           |
| ppsA-F      | GGTCGCTCGGTCAAGGTAGTGG   | <i>ppsA</i> | 989                   | 56                         | 1         |
| ppsA-R      | GGGTTCTCTTCTTCCGGCTCGTAG |             |                       |                            |           |
| trpE-F      | GCGGCCAGGGTCGTGAG        | <i>trpE</i> | 811                   | 56                         | 1         |
| trpE-R      | CCCGGCGCTTGTTGATGGTT     |             |                       |                            |           |
| exoU-F      | ATGCATATCCAATCGTTG       | <i>exoU</i> | 2000                  | 55                         | 2         |
| exoU-R      | TCATGTGAACTCCTTATT       |             |                       |                            |           |
| exoS-F      | GCGAGGTCAGCAGAGTATCG     | <i>exoS</i> | 118                   | 60                         | 2         |
| exoS-R      | TTCGGCGTCACTGTGGAT       |             |                       |                            |           |
| exoY-F      | CGGATTCTATGGCAGGGAGG     | <i>exoY</i> | 289                   | 60                         | 2         |
| exoY-R      | GCCCTTGATGCACTCGACCA     |             |                       |                            |           |
| exoT-F      | AATCGCCGTCCA ACTGCATGCG  | <i>exoT</i> | 152                   | 60                         | 2         |
| exoT-R      | TGTTGCGCCGAGG TACTGCTC   |             |                       |                            |           |
| exoA-F      | GACAACGCCCTCAGCATCACCAGC | <i>exoA</i> | 396                   | 60                         | 2         |

|            |                          |                    |      |    |   |
|------------|--------------------------|--------------------|------|----|---|
| exoA-R     | CGCTGGCCCATTCGCTCCAGCGCT |                    |      |    |   |
| lasA-F     | CGCCATCCAACCTGATGCAAT    | <i>lasA</i>        | 514  | 60 | 2 |
| lasA-R     | AGGCCGGGGTTGTACAACGGA    |                    |      |    |   |
| lasB-F     | TTCTACCCGAAGGACTGATAC    | <i>lasB</i>        | 153  | 55 | 2 |
| lasB-R     | AACACCCATGATCGCAAC       |                    |      |    |   |
| aprA-F     | ACCCTGTCCTATTCGTTCC      | <i>aprA</i>        | 140  | 55 | 2 |
| aprA-R     | GATTGCAGCGACAACCTTG      |                    |      |    |   |
| rhlAB-F    | TCATGGAATTGTCACAACCGC    | <i>rhlAB</i>       | 151  | 60 | 2 |
| rhlAB-R    | ATACGGCAAATCATGGCAAC     |                    |      |    |   |
| rhlI-F     | CTTGGTCATGATCGAATTGCTC   | <i>rhlI</i>        | 625  | 60 | 2 |
| rhlI-R     | ACGGCTGACGACCTCACAC      |                    |      |    |   |
| rhlR-F     | CAATGAGGAATGACGGAGGC     | <i>rhlR</i>        | 730  | 60 | 2 |
| rhlR-R     | GCTTCAGATGAGGCCAGC       |                    |      |    |   |
| lasI-F     | ATGATCGTACAAATTGGTCGGC   | <i>lasI</i>        | 605  | 60 | 2 |
| lasI-R     | GTCATGAAACCGCCAGTCG      |                    |      |    |   |
| lasR-F     | CGGGTATCGTACTAGGTGCATCA  | <i>lasR</i>        | 1100 | 60 | 2 |
| lasR-R     | GACGGGAAAGCCAGGAAACTT    |                    |      |    |   |
| intI1-F    | GGGTCAAGGATCTGGATTTTCG   | <i>intI1</i>       | 483  | 62 | 3 |
| intI1-R    | ACATGCGTGTAATCATCGTCG    |                    |      |    |   |
| intI2-F    | CACGGATATGCGACAAAAGGT    | <i>intI2</i>       | 788  | 62 | 3 |
| intI2-R    | GTAGCAAACGAGTGACGAAATG   |                    |      |    |   |
| intI3-F    | GCCTCCGGCAGCGACTTTCAG    | <i>intI3</i>       | 979  | 62 | 3 |
| intI3-R    | ACGGATCTGCCAAACCTGACT    |                    |      |    |   |
| qacEΔ1-F   | GGCTGGCTTTTTCTTGTTATCG   | <i>qacEΔ1-sul1</i> | 1125 | 63 | 3 |
| sul1-R     | GCGAGGGTTTCCGAGAAGGTG    |                    |      |    |   |
| OprDlong-F | CTACGCAGATGCGACATGC      | <i>oprD</i>        | 1586 | 55 | 4 |

---

|            |                      |             |      |    |   |
|------------|----------------------|-------------|------|----|---|
| OprDlong-R | CCTTTATAGGCGCGTTGCC  |             |      |    |   |
| OprD-F     | CGCCGACAAGAAGAACTAGC | <i>oprD</i> | 1413 | 55 | 5 |
| OprD-R     | GTCGATTACAGGATCGACAG |             |      |    |   |

---

1. Curran B, Jonas D, Grundmann H, Pitt T, Dowson CG (2004) Development of a multilocus sequence typing scheme for the opportunistic pathogen *Pseudomonas aeruginosa*. *J Clin Microbiol* 42:5644–5649.
2. Petit SM, Lavenir R, Colignon-Dupuich C, Boukerb AM, Cholley P, Bertrand X, Freney J, Doléans-Jordheim A, Nazaret S, Laurent F, Cournoyer B (2013) Lagooning of wastewaters favors dissemination of clinically relevant *Pseudomonas aeruginosa*. *Res Microbiol* 164(8):856-866.
3. Sáenz Y, Briñas L, Domínguez E, Ruiz J, Zarazaga M, Vila J, Torres C (2004) Mechanisms of resistance in multiple-antibiotic-resistant *Escherichia coli* strains of human, animal and food origins. *Antimicrob Agents Chemother* 48:3996–4001.
4. Wolter DJ, Hanson ND, Lister PD (2004) Insertional inactivation of *oprD* in clinical isolates of *Pseudomonas aeruginosa* leading to carbapenem resistance. *FEMS Microbiol Lett* 236:137–143.
5. Gutiérrez O, Juan C, Cercenado E, Navarro F, Bouza E, Coll P, Pérez JL, Oliver A (2007) Molecular epidemiology and mechanisms of carbapenem resistance in *Pseudomonas aeruginosa* isolates from Spanish hospitals. *Antimicrob Agents Chemother* 51:4329-4335.

**Table S2.** Characteristics of *P. aeruginosa* isolates recovered from faecal samples of children

| Children                                          |                     |             | Strain <sup>b</sup> | Phenotype <sup>a</sup> | Patterns |                     |                   |                        |
|---------------------------------------------------|---------------------|-------------|---------------------|------------------------|----------|---------------------|-------------------|------------------------|
| Individual<br>(underlying diseases <sup>a</sup> ) | Gender <sup>a</sup> | Age (years) |                     |                        | PFGE     | MLST <sup>a</sup>   | OprD <sup>d</sup> | Virulence <sup>e</sup> |
| 1 (none)                                          | M                   | 13          | <b>Ps514</b>        | Susceptible            | 21       | ST244               | A                 | I                      |
| 2 (none)                                          | M                   | 4           | <b>Pc6</b>          | Susceptible            | 35       | -                   | A                 | I                      |
| 3 (none)                                          | M                   | 7           | <b>Pc10</b>         | AZT,CAZ, FEP           | 39       | ST244               | A                 | II                     |
| 4 (none)                                          | M                   | 13          | <b>Pc15</b>         | Susceptible            | 44       | ST244               | A                 | I                      |
| 5 (atopic dermatitis)                             | M                   | 1           | <b>Ps488</b>        | Susceptible            | 3        | ST903               | B                 | I                      |
| 6 (none)                                          | M                   | 10          | <b>Ps492</b>        | Susceptible            | 6        | ST132               | B                 | I                      |
| 7 (none)                                          | M                   | 1           | <b>Ps493</b>        | Susceptible            | 7        | ST555               | B                 | I                      |
| 8 (weight delay)                                  | M                   | 3           | <b>Ps494</b>        | Susceptible            | 8        | ST252               | B                 | I                      |
| 9 (none)                                          | M                   | 5           | <b>Ps495</b>        | Susceptible            | 9        | ST27                | B                 | I                      |
| 10 (none)                                         | F                   | 2           | <b>Ps496</b>        | Susceptible            | 10       | ST390               | B                 | I                      |
| 11 (none)                                         | M                   | 5           | <b>Ps497</b>        | Susceptible            | 10       | ST390               | B                 | I                      |
| 12 (none)                                         | F                   | 11          | <b>Ps501</b>        | Susceptible            | 14       | ST2241 <sup>c</sup> | B                 | I                      |
| 13 (lactose intolerance)                          | F                   | 1           | <b>Ps502</b>        | Susceptible            | 15       | ST980               | B                 | I                      |
| 14 (none)                                         | M                   | 3           | <b>Ps507</b>        | Susceptible            | 18       | ST139               | B                 | I                      |
| 15 (none)                                         | M                   | 2           | <b>Ps510</b>        | Susceptible            | 19       | ST1205              | B                 | III                    |
| 16 (none)                                         | F                   | 5           | <b>Ps515</b>        | Susceptible            | 22       | ST668               | B                 | I                      |
| 17 (none)                                         | M                   | 7           | <b>Ps516</b>        | Susceptible            | 23       | ST1033              | B                 | I                      |
| 18 (none)                                         | M                   | 1           | <b>Ps518</b>        | Susceptible            | 25       | ST27                | B                 | I                      |
| 19 (none)                                         | M                   | 2           | <b>Ps520</b>        | Susceptible            | 27       | ST395               | B                 | I                      |
| 20 (none)                                         | F                   | 3           | <b>Ps521</b>        | Susceptible            | 28       | ST499               | B                 | I                      |
| 21 (none)                                         | M                   | 8           | <b>Pc3</b>          | Susceptible            | 32       | ST527               | B                 | I                      |
| 22 (none)                                         | F                   | 13          | <b>Pc8</b>          | Susceptible            | 37       | -                   | B                 | I                      |
| 23 (Williams syndrome)                            | F                   | 0.25        | <b>Pc11</b>         | GEN                    | 40       | -                   | B                 | IV                     |
| 24 (none)                                         | F                   | 2           | <b>Pc12</b>         | Susceptible            | 41       | -                   | B                 | I                      |
| 25 (none)                                         | F                   | 2           | <b>Pc13</b>         | Susceptible            | 42       | -                   | B                 | I                      |
| 26 (none)                                         | M                   | 5           | <b>Pc17</b>         | Susceptible            | 46       | ST508               | B                 | I                      |

| Children                                          |                     |             | Patterns            |                        |      |                     |                   |                        |
|---------------------------------------------------|---------------------|-------------|---------------------|------------------------|------|---------------------|-------------------|------------------------|
| Individual<br>(underlying diseases <sup>a</sup> ) | Gender <sup>a</sup> | Age (years) | Strain <sup>b</sup> | Phenotype <sup>a</sup> | PFGE | MLST <sup>a</sup>   | OprD <sup>d</sup> | Virulence <sup>e</sup> |
| 27 (none)                                         | F                   | 2           | <b>Pc19</b>         | Susceptible            | 48   | -                   | B                 | I                      |
| 28 (none)                                         | F                   | 9           | <b>Pc22</b>         | Susceptible            | 51   | ST254               | B                 | I                      |
| 29 (none)                                         | M                   | 9           | <b>Pc24</b>         | Susceptible            | 53   | -                   | B                 | V                      |
| 30 (none)                                         | F                   | 2           | <b>Pc26</b>         | Susceptible            | 55   | -                   | B                 | I                      |
| 31 (anorexia)                                     | F                   | 13          | <b>Pc27</b>         | Susceptible            | 56   | -                   | B                 | I                      |
| 32 (none)                                         | M                   | 1           | <b>Pc28</b>         | Susceptible            | 57   | -                   | B                 | I                      |
| 33 (none)                                         | M                   | 3           | <b>Pc35</b>         | Susceptible            | 61   | -                   | B                 | I                      |
| 34 (none)                                         | M                   | 0.50        | <b>Pc39</b>         | Susceptible            | 65   | -                   | B                 | I                      |
| 35 (none)                                         | M                   | 4           | <b>Pc43</b>         | TZP, AZT, CAZ, FEP     | 68   | ST274               | B                 | I                      |
| 36 (none)                                         | M                   | 2           | <b>Ps487</b>        | Susceptible            | 2    | ST446               | C                 | VII                    |
| 37 (none)                                         | F                   | 0.14        | <b>Ps498</b>        | Susceptible            | 11   | ST253               | C                 | VII                    |
| 38 (none)                                         | F                   | 0.11        | <b>Ps500</b>        | Susceptible            | 13   | ST299               | C                 | I                      |
| 39 (weight delay)                                 | M                   | 0.06        | <b>Ps517</b>        | Susceptible            | 24   | ST1197              | C                 | VII                    |
| 40 (atopic dermatitis)                            | F                   | 1           | <b>Ps519</b>        | Susceptible            | 26   | ST253               | C                 | VIII                   |
| 41 (none)                                         | M                   | 3           | <b>Ps522</b>        | Susceptible            | 29   | ST1664              | C                 | I                      |
| 42 (none)                                         | F                   | 10          | <b>Pc4</b>          | Susceptible            | 33   | ST1648              | C                 | VI                     |
| 43 (none)                                         | F                   | 13          | <b>Pc5</b>          | Susceptible            | 34   | -                   | C                 | X                      |
| 44 (cystic fibrosis)*                             | F                   | 4           | <b>Pc7</b>          | TZP                    | 36   | -                   | C                 | VII                    |
| 45 (none)                                         | M                   | 1           | <b>Pc14</b>         | Susceptible            | 43   | -                   | C                 | VII                    |
| 46 (none)                                         | M                   | 0.50        | <b>Pc18</b>         | Susceptible            | 47   | ST2222 <sup>c</sup> | C                 | XII                    |
| 47 (none)                                         | F                   | 7           | <b>Pc20</b>         | Susceptible            | 49   | -                   | C                 | I                      |
| 48 (none)                                         | M                   | 5           | <b>Pc29</b>         | Susceptible            | 58   | ST2223 <sup>c</sup> | C                 | VII                    |
| 49 (none)                                         | M                   | 0.33        | <b>Pc30</b>         | GEN, CIP               | 58   | -                   | C                 | VII                    |
| 50 (none)                                         | F                   | 2           | <b>Pc40</b>         | TZP, AZT, CAZ, FEP     | 66   | -                   | C                 | I                      |
| 51 (none)                                         | M                   | 7           | <b>Pc42</b>         | Susceptible            | 67   | -                   | C                 | VII                    |
| 52 (PD/D)                                         | M                   | 3           | <b>Ps489</b>        | Susceptible            | 4    | ST1182              | D                 | IX                     |
| 53 (none)                                         | M                   | 2           | <b>Ps491</b>        | Susceptible            | 5    | ST671               | D                 | VII                    |
| 54 (lactose intolerance)                          | F                   | 0.33        | <b>Ps499</b>        | Susceptible            | 12   | ST207               | D                 | VII                    |
| 55 (none)                                         | F                   | 1           | <b>Ps505</b>        | Susceptible            | 16   | ST2242 <sup>c</sup> | D                 | IX                     |

| Children                                          |                     |             | Strain <sup>b</sup> | Phenotype <sup>a</sup> | Patterns |                     |                   |                        |
|---------------------------------------------------|---------------------|-------------|---------------------|------------------------|----------|---------------------|-------------------|------------------------|
| Individual<br>(underlying diseases <sup>a</sup> ) | Gender <sup>a</sup> | Age (years) |                     |                        | PFGE     | MLST <sup>a</sup>   | OprD <sup>d</sup> | Virulence <sup>e</sup> |
| 56 (none)                                         | F                   | 2           | <b>Ps512</b>        | Susceptible            | 20       | ST560               | D                 | VII                    |
| 57 (none)                                         | F                   | 11          | <b>Pc2</b>          | Susceptible            | 31       | ST1149              | D                 | VII                    |
| 58 (none)                                         | M                   | 1           | <b>Pc23</b>         | Susceptible            | 52       | ST313               | D                 | VII                    |
| 59 (none)                                         | M                   | 1           | <b>Pc33</b>         | TZP, AZT, CAZ, FEP     | 60       | ST1411              | D                 | VII                    |
| 60 (none)*                                        | M                   | 0.67        | <b>Pc37</b>         | Susceptible            | 63       | ST313               | D                 | XI                     |
| 61 (none)                                         | M                   | 8           | <b>Pc38</b>         | Susceptible            | 64a      | -                   | D                 | IX                     |
| 62 (none)                                         | F                   | 1           | <b>Pc41</b>         | Susceptible            | 64b      | -                   | D                 | IX                     |
| 63 (none)                                         | F                   | 10          | <b>Pc16</b>         | Susceptible            | 45       | ST2143              | E                 | XII                    |
| 64 (none)                                         | M                   | 1           | <b>Pc31</b>         | TZP, AZT, CAZ, FEP     | 59       | ST667               | E                 | IX                     |
| 65 (none)                                         | M                   | 12          | <b>Pc32</b>         | Susceptible            | 59       | -                   | E                 | IX                     |
| 66 (none)                                         | F                   | 2           | <b>Pc36</b>         | Susceptible            | 62       | ST667               | E                 | XI                     |
| 67 (none)                                         | F                   | 5           | <b>Ps486</b>        | Susceptible            | 1        | ST277               | F                 | I                      |
| 68 (none)                                         | M                   | 2           | <b>Pc9</b>          | Susceptible            | 38       | ST2125              | F                 | I                      |
| 69 (none)                                         | M                   | 2           | <b>Pc21</b>         | Susceptible            | 50       | -                   | F                 | I                      |
| 70 (none)                                         | M                   | 5           | <b>Pc25</b>         | Susceptible            | 54       | -                   | F                 | VI                     |
| 71 (none)                                         | F                   | 14          | <b>Ps506</b>        | CAZ                    | 17       | ST1398              | G                 | I                      |
| 72 (none)                                         | F                   | 1           | <b>Pc1</b>          | IPM                    | 30       | ST2221 <sup>c</sup> | H                 | XIII                   |

<sup>a</sup> Abbreviations: PD/D, psychomotor disturbance / delay; M, male; F, female; AZT, aztreonam; CAZ, ceftazidime; FEP, cefepime; GEN, gentamicin; TZP, piperacillin-tazobactam; IPM, imipenem; -, not determined. \* This child had received antibiotic treatment in the three months previous to sampling.

<sup>b</sup> Pc are strains from HLB; and Ps from HSP

<sup>c</sup> New MLST detected

<sup>d</sup> OprD patterns classified according to Table 2.

<sup>e</sup> Virulence profiles defined according to Table 1.
